# Supplementary material for: Effects of codon usage on gene expression are promoter context dependent
Source: PubMed Central journal article supplement — Nucleic Acids Res. 2021 Jan 7;49(2):818–31. doi: 10.1093/nar/gkaa1253 (PMC7826287; doi:10.1093/nar/gkaa1253), 2021-01-07
Supplement: gkaa1253_supplemental_file.pdf [file gkaa1253_supplemental_file.pdf]

## Supplemental Figures and Tables.

**Figure S1.** Scatter plots of differential genome-wide correlations between codon usage and mRNA levels between constitutive and facultative genes from indicated organisms and tissues. Pearson correlation coefficients are shown in Figure 1.

**Figure S2.** (A) Northern blot analysis of *De-Luc* and *Opt-Luc* mRNAs expressed under the control of the *Myc* core promoter and the *Myc* or DSCP IDR. (B) Northern blot analysis of *De-Luc* and *Opt-Luc* mRNA under control of the *Hsp70* core promoter with mutations in the left (MutL), middle (MutM), and right (MutR) 10 nt of the 20-nt CDE sequence. (C) Northern blot analysis of *De-Luc* and *Opt-Luc* mRNA expressed under control of the *Act5C* core promoter with indicated CDE sequences.

**Figure S3.** (A) Northern blot analysis of *gapdh* and U6 RNA levels in nuclear and total fractions. (B) Northern blot analysis of mRNA levels of *hph* and *Gal4* in indicated stable cell lines. (C) Quantification of the relative *hph* mRNA levels for experiment shown in panel A. (D) Quantification of the relative *Gal4* mRNA levels for experiment shown in panel A. (E) Positive and negative controls for Pol II CTD ChIP assay.

**Figure S4.** (A) Positive and negative controls for H3K27ac ChIP assay. (B) H3K9me3 ChIP assay for H3K9me3 over the 5' *Myc*-tag region of different constructs. qPCR primers amplify the 5' *Myc*-tag sequence, and data were normalized to F22. (C) H3K27me3 ChIP assay for H3K27me3 over the 5' *Myc*-tag region of indicated constructs. qPCR primers amplify the 5' *Myc*-tag sequence, and data were normalized to a region in 3L. (D) Positive and negative controls for H3K9me3 ChIP assay. (E) Positive and negative controls for H3K27me3 ChIP assay. (F) Positive and negative controls for H3 ChIP assay. Data are means  $\pm$  SD. ns: not significant.

**Figure S5.** Northern blot analyses showing the downregulation of the indicated mRNA after introducing gene specific dsRNA.

**Table S1: Nucleotide sequences of the reporter genes and promoters used in this study.**

**Table S2: RNA-seq samples of human (different tissues), *Drosophila Melanogaster* (different tissues and different time points) and *Neurospora crassa* (different carbo sources) analyzed in Figure 1B-D.**

**Table S3: Primer sequences used for probe amplification in Northern blot analyses.**

Figure S1

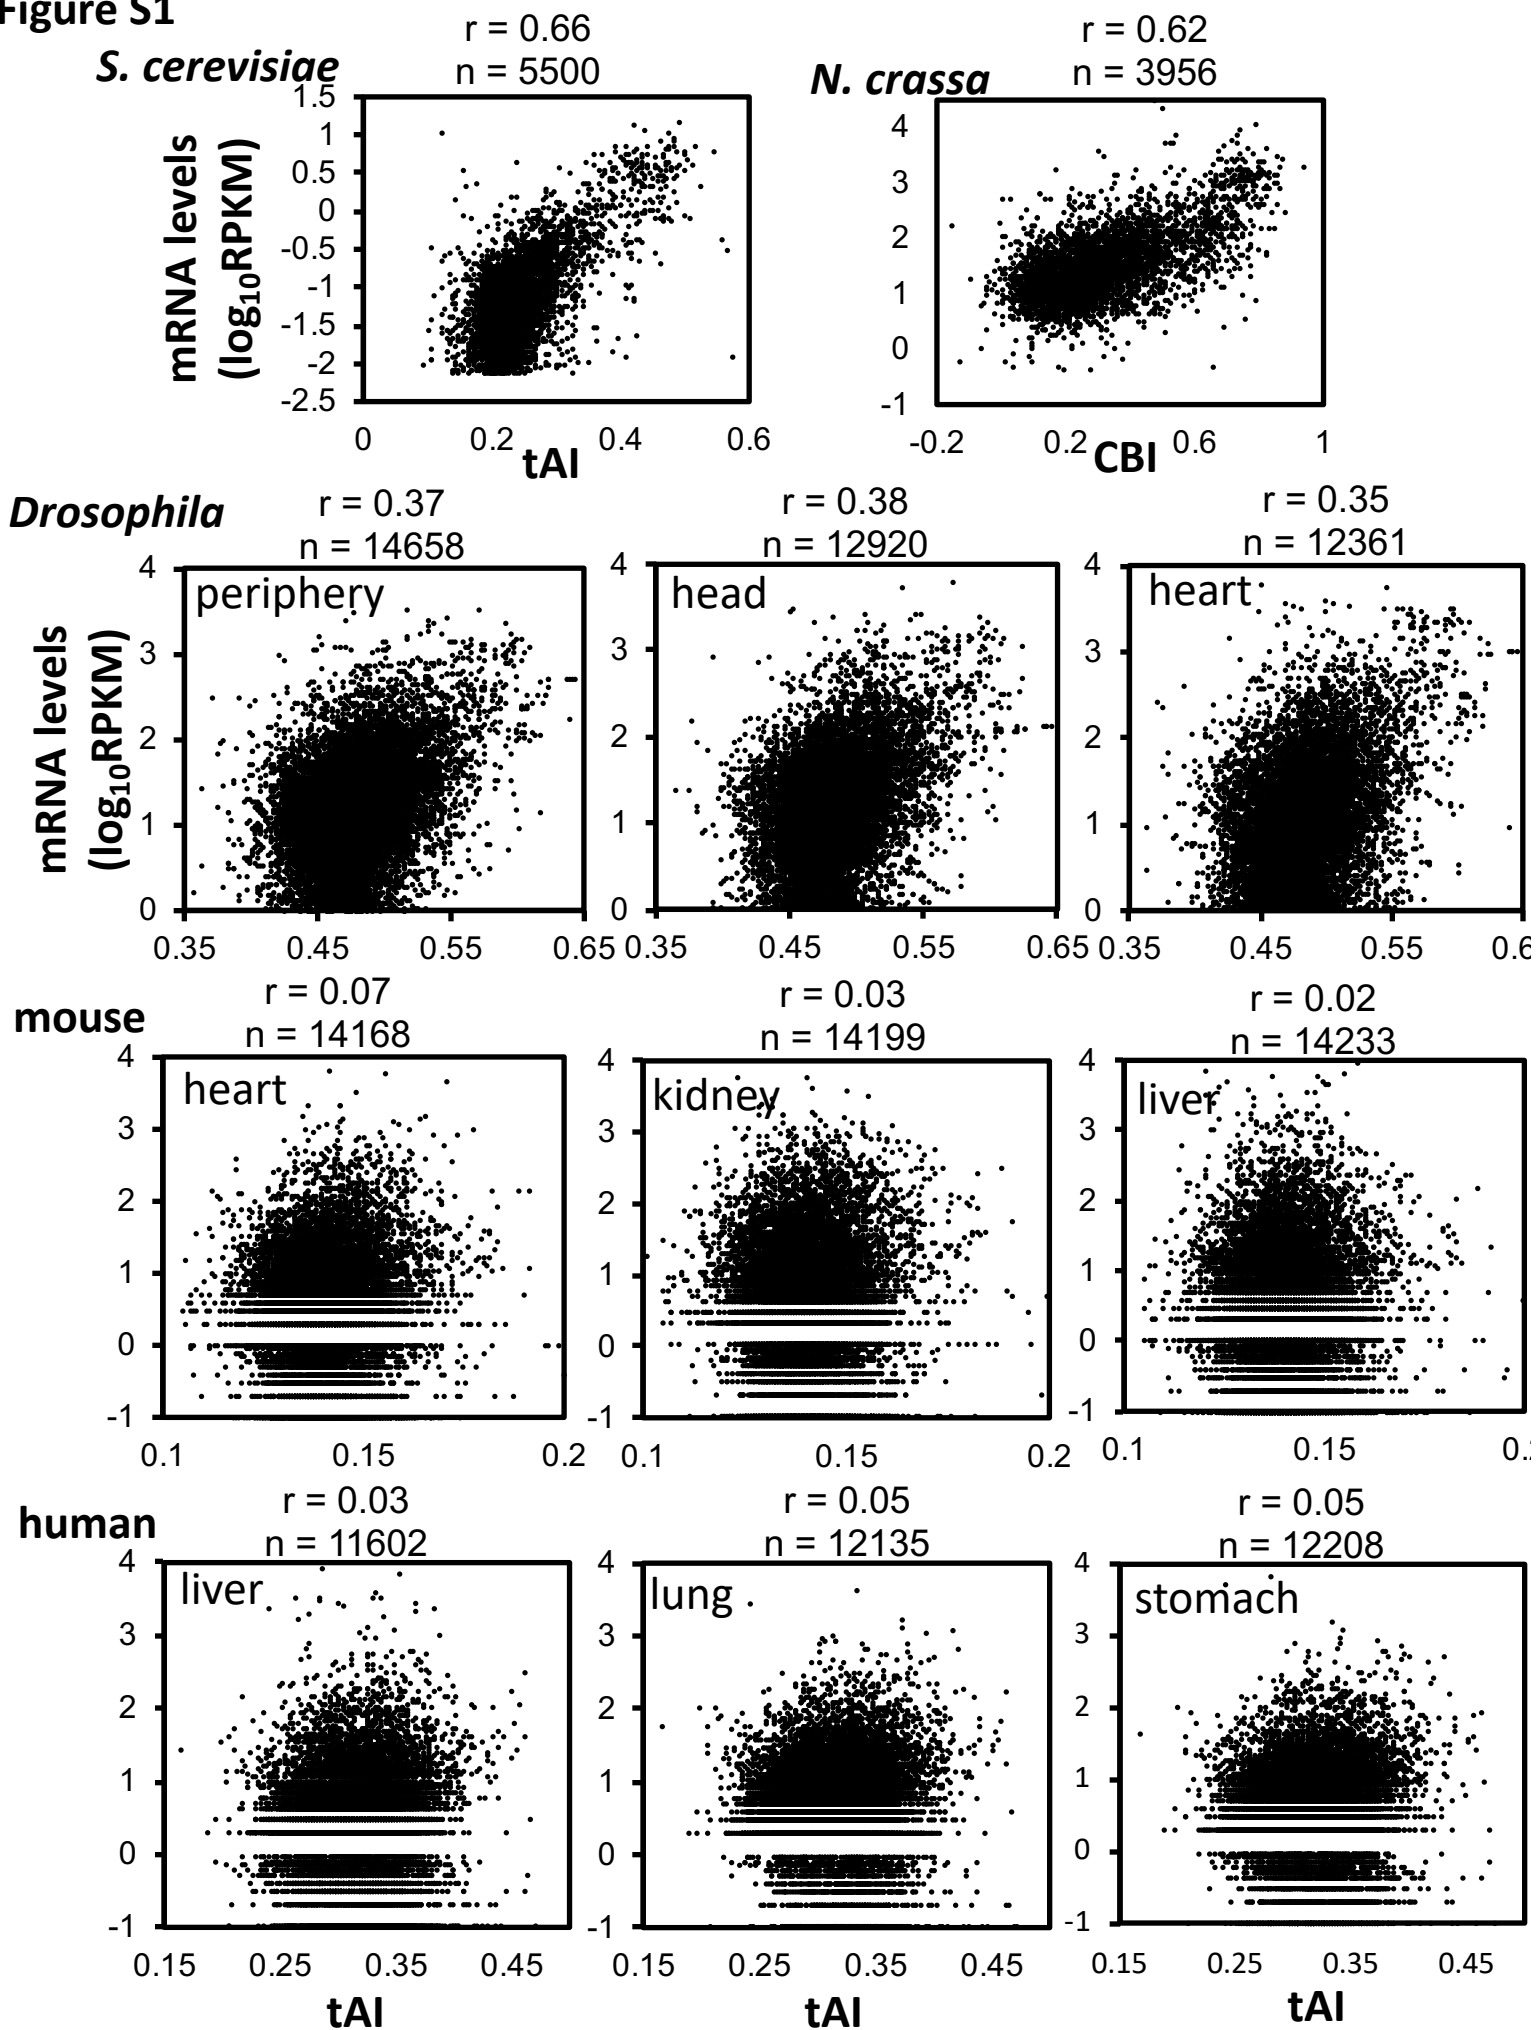

**Figure S2**

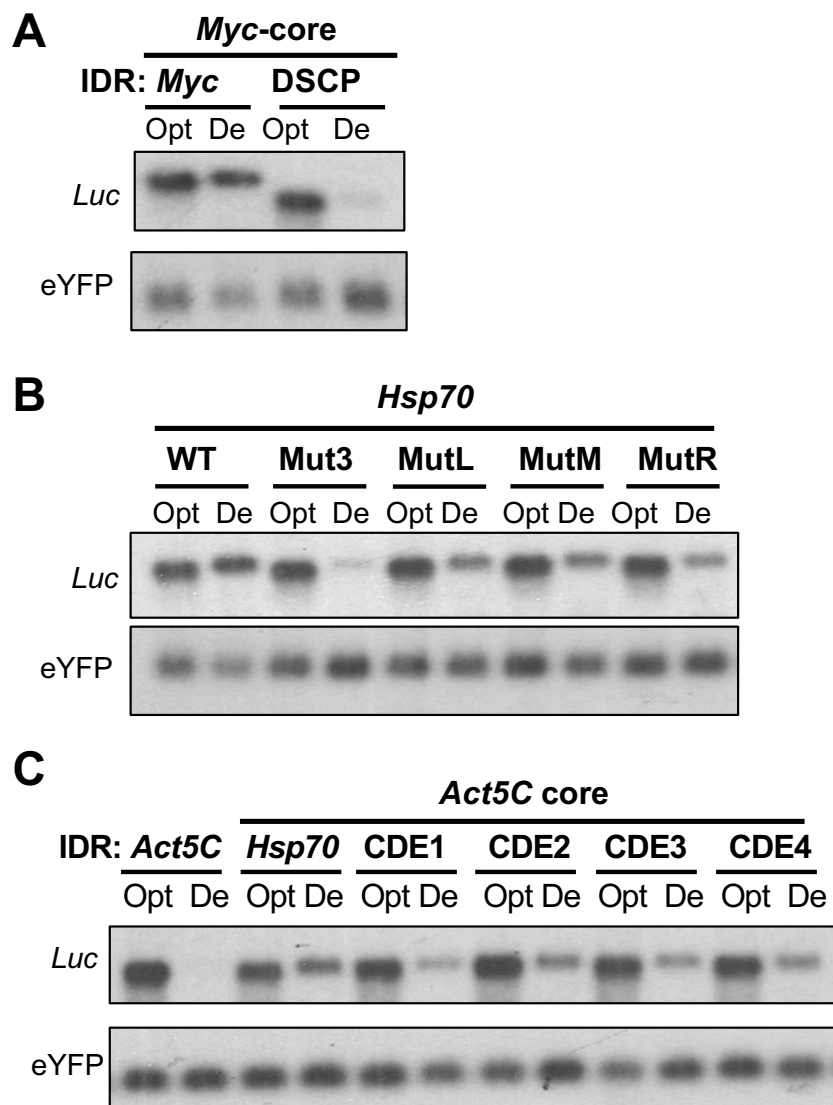

**Figure S3**

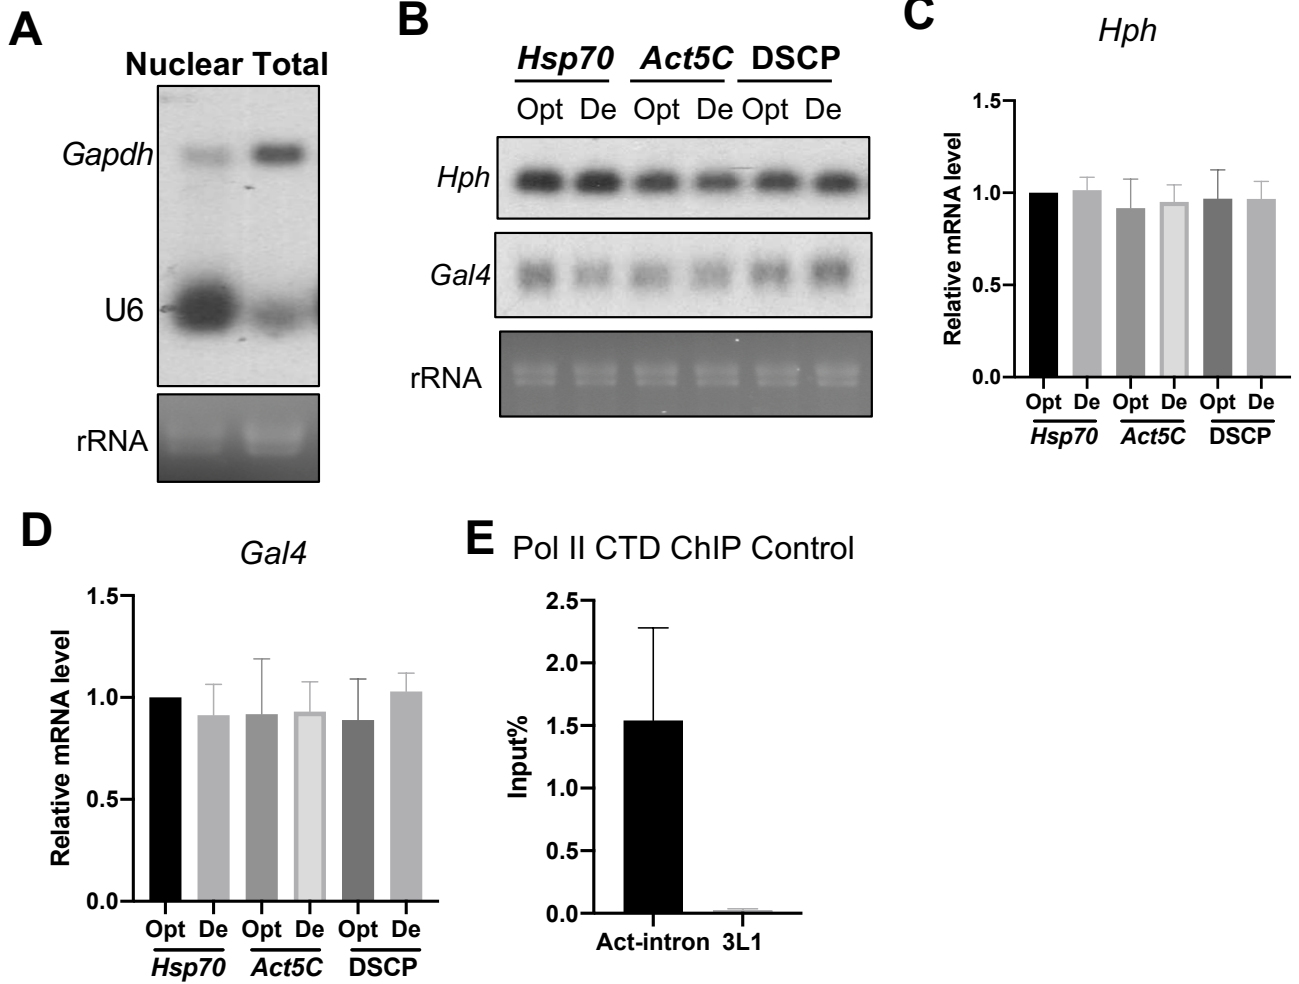

**Figure S4**

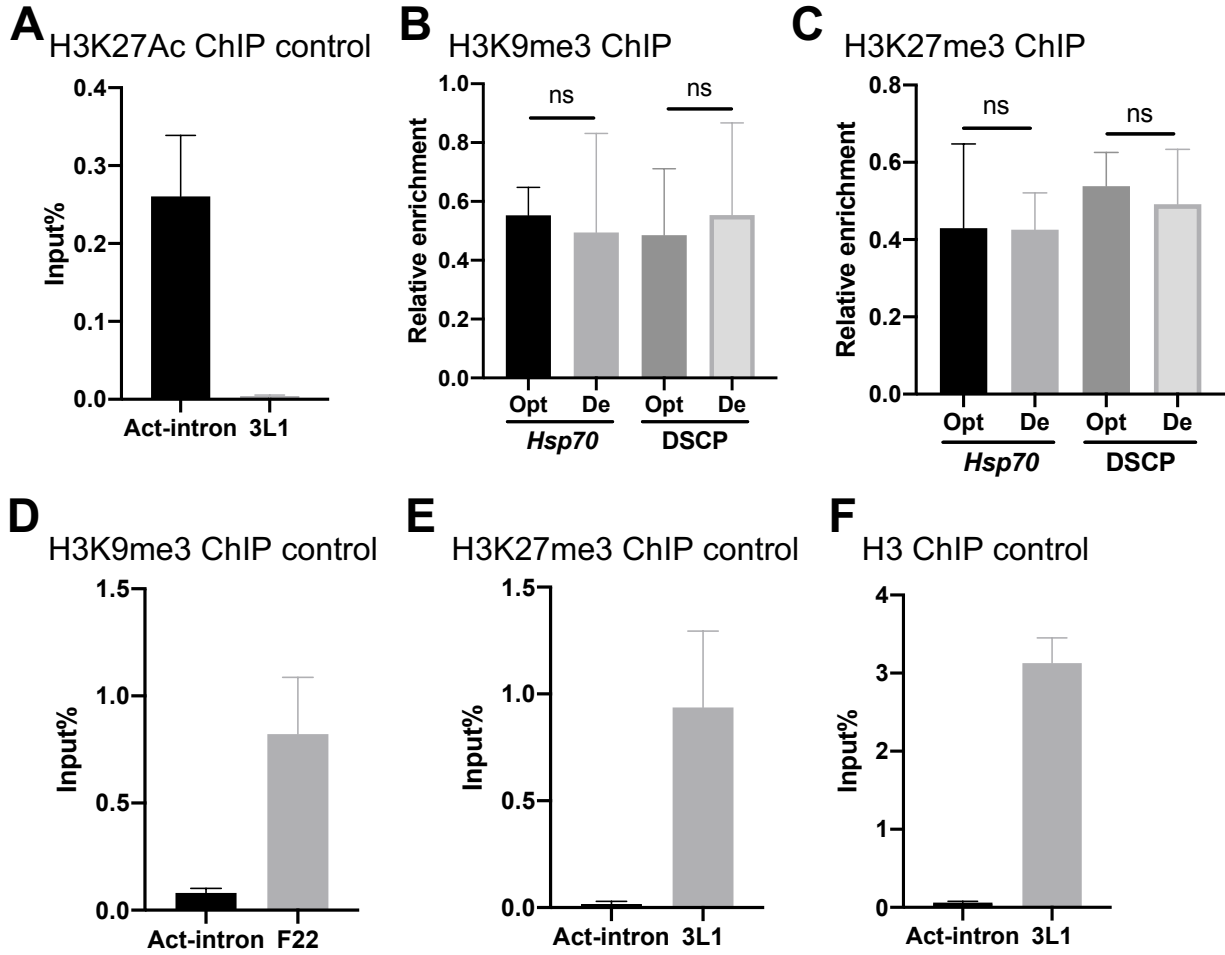

**Figure S5**

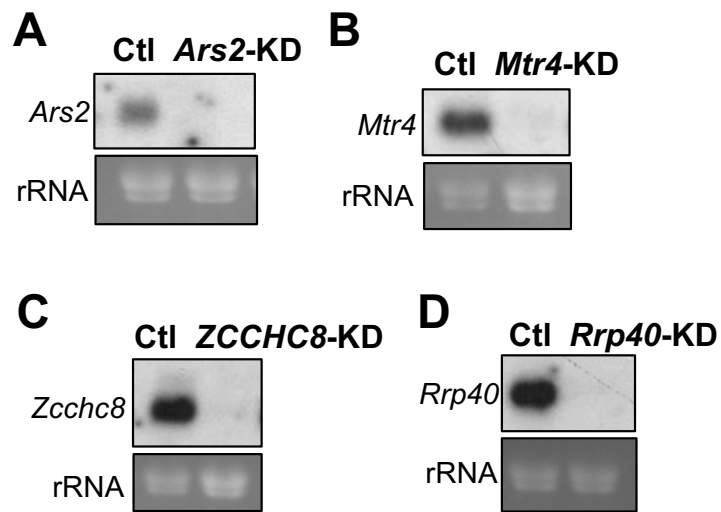

**Table S1. Nucleotide sequences of the reporter genes and promoters used in this study**

> Opt luciferase

ATGGAAGACGCCAAAAACATAAAGAAAGGCCCGCCCCCTTCTACCCCCTGGAGGATGGCACCGCCGG  
CGAGCAGCTGCACAAGGCCATGAAGCGCTACGCCCTGGTGCCCGGCACCATCGCCTTACCGATGCCCA  
CATCGAGGTGGATATCACCTACGCCGAGTACTTCGAGATGAGCGTGCGCCTGGCCGAGGCCATGAAGC  
GCTACGGCCTGAACACCAACCACCGCATCGTGGTGTGCAGCGAGAACAGCCTGCAGTTCTTCATGCCCG  
TGCTGGGCGCCCTGTTTCATCGGCGTGGCCGTGGCCCCCGCAACGATATCTACAACGAGCGCGAGCTGC  
TGAACAGCATGGGCATCAGCCAGCCACCGTGGTGTTCGTGAGCAAGAAGGGCCTGCAGAAGATCCTG  
AACGTGCAGAAGAAGCTGCCATCATCCAGAAGATCATCATATGGATAGCAAGACCGATTACCAGGGC  
TTCCAGAGCATGTACACCTTCGTGACCAGCCACCTGCCCCCGGCTTCAACGAGTACGATTTCTGCCCCG  
AGAGCTTCGATCGCGATAAGACCATCGCCCTGATCATGAACAGCAGCGGCAGCACCGGCCTGCCAAG  
GGCGTGGCCCTGCCCCACCGCACCGCCTGCGTGCCTCAGCCACGCCCGGATCCCATCTTCGGCAACC  
AGATCATCCCCGATACCGCATCTGAGCGTGGTGCCTTCCACCACGGCTTCGGCATGTTACCACCCT  
GGGCTACCTGATCTGCGGCTTCGCGTGGTGTGATGTACCGCTTCGAGGAGGAGCTGTTCTGCGCAG  
CCTGCAGGATTACAAGATCCAGAGCGCCCTGCTGGTGGCCACCCTGTTTCAGCTTCTTCGCCAAGAGCACC  
CTGATCGATAAGTACGATCTGAGCAACCTGCACGAGATCGCCAGCGGCGGCCCCCCCTGAGCAAGGA  
GGTGGGCGAGGCCGTGGCCAAGCGCTTCCACCTGCCCGGCATCCGCCAGGGCTACGGCCTGACCGAGA  
CCACCAGCGCCATCTGATCACCCCCGAGGGCGATGATAAGCCCGCGCCGTGGGCAAGGTGGTGGCC  
TTCTTCGAGGCCAAGGTGGTGGATCTGGATACCGGCAAGACCCTGGGCGTGAACCAGCGCGGCGAGCT  
GTGCGTGCAGCGGCCCATGATCATGAGCGGCTACGTGAACAACCCCGAGGCCACCAACGCCCTGATCG  
ATAAGGATGGCTGGCTGCACAGCGGCGATATCGCCTACTGGGATGAGGATGAGCACTTCTTCATCGTGG  
ATCGCCTGAAGAGCCTGATCAAGTACAAGGGCTACCAGGTGGCCCCCGCCGAGCTGGAGAGCATCCTG  
CTGCAGCACCCCAACATCTTCGATGCCGGCGTGGCCGGCCTGCCCGATGATGATGCCGGCGAGCTGCC  
GCCGCCGTGGTGGTGTGAGCACGGCAAGACCATGACCGAGAAGGAGATCGTGGATTACGTGGCCA  
GCCAGGTGACCACCGCCAAGAAGCTGCGCGGCGGCGTGGTGTTCGTGGATGAGGTGCCCAAGGGCCT  
GACCGGCAAGCTGGATGCCCGCAAGATCCGCGAGATCCTGATCAAGGCCAAGAAGGGCGGCAAGATC  
GCCGTGTAA

> De luciferase

ATGGAAGACGCCAAAAACATAAAGAAAGGCCCTGCACCTTTTTATCCTTTAGAAGACGGGACTGCAGGG  
GAACAATTACATAAAGCAATGAAAAGATATGCATTAGTACCTGGGACTATAGCATTACTGACGCACAT  
ATAGAAGTAGACATAAATTATGCAGAATATTTGAAATGTCTGTAAGATTAGCAGAAGCAATGAAAAGA  
TATGGGTTAAATACTAATCATAGAATAGTAGTATGTTCTGAAAATTCTTTACAATTTTTATGCCTGTATT  
AGGGGCATTATTTATAGGGGTAGCAGTAGCACCTGCAATGACATATATAATGAAAGAGAATTATTA  
TTCTATGGGGATATCTCAACCTACTGTAGTATTTGTATCTAAAAAAGGGTTACAAAAAATATTAATGTA  
CAAAAAAATTACCTATAATACAAAAATAATAATAATGGACTCTAAACTGACTATCAAGGGTTTCAAT  
CTATGTATACTTTGTAACCTTCTCATTACCTCCTGGGTTTAAATGAATATGACTTTGTACCTGAATCTTTG  
ACAGAGACAAAATATAGCATTAAATAATGAATTCTTCTGGGTCTACTGGGTTACCTAAAGGGGTAGCATT  
ACCTCATAGAACTGCATGTGTAAGATTTTCTCATGCAAGAGACCCTATATTTGGGAATCAATAATACCT  
GACTGCAATATTATCTGTAGTACCTTTTCATCATGGGTTTGGGATGTTTACTACTTTAGGGTATTTAAT  
ATGTGGGTTTLAGAGTAGTATTAATGTATAGATTTGAAGAAGAATTATTTTAAAGATCTTTACAAGACTAT  
AAAATACAATCTGCATTATTAGTACCTACTTTATTTTCTTTTTTGCAAAATCTACTTTAATAGACAAATAT  
GACTTATCTAATTTACATGAAATAGCATCTGGGGGGGCACCTTTATCTAAAGAAGTAGGGGAAGCAGTA

GCAAAAAGATTTTCATTTACCTGGGATAAGACAAGGGTATGGGTAACTGAACTACTTCTGCAATATTA  
TAACTCCTGAAGGGGACGACAAACCTGGGGCAGTAGGGAAAGTAGTACCTTTTTTTGAAGCAAAAGTA  
GTAGACTTAGACACTGGGAAAACCTTAGGGGTAAATCAAAGAGGGGAATTATGTGTAAGAGGGCCTAT  
GATAATGTCTGGGTATGTAAATAATCCTGAAGCAACTAATGCATTAATAGACAAAGACGGGTGGTTACA  
TTCTGGGGACATAGCATATTGGGACGAAGACGAACATTTTTTTATAGTAGACAGATTAATAATCTTTAATA  
AAATATAAAGGGTATCAAGTAGCACCTGCAGAATTAGAATCTATATTATTACAACATCCTAATATATTTG  
ACGCAGGGGTAGCAGGGTTACCTGACGACGACGACGGGGAAATTACCTGCAGCAGTAGTAGTATTAGAA  
CATGGGAAAACCTATGACTGAAAAGAAATAGTAGACTATGTAGCATCTCAAGTAACTACTGCAAAAAA  
TTAAGAGGGGGGTAGTATTTGTAGACGAAGTACCTAAAGGGTAACTGGGAAATTAGACGCAAGAAA  
AATAAGAGAAATATTAATAAAAGCAAAAAAAGGGGGGAAAATAGCAGTATAA

> Opt YFP

ATGGTGAGCAAGGGCGAGGAGCTGTTACCGGGGTGGTGCCCATCCTGGTCGAGCTGGACGGCGACG  
TAAACGGCCACAAGTTCAGCGTGTCCGGCGAGGGCGAGGGCGATGCCACCTACGGCAAGCTGACCCTG  
AAGTTCATCTGCACCACCGGCAAGCTGCCCGTGCCCTGGCCACCCTCGTGACCACCTTCGGCTACGGCC  
TGCAGTGCTTCGCCCCTACCCCGACCACATGAAGCAGCACGACTTCTTCAAGTCCGCCATGCCGAAG  
GCTACGTCCAGGAGCGCACCATCTTCTTCAAGGACGACGGCAACTACAAGACCCGCGCCGAGGTGAAG  
TTCGAGGGCGACACCCTGGTGAACCGCATCGAGCTGAAGGGCATCGACTTCAAGGAGGACGGCAACAT  
CCTGGGGCACAAGCTGGAGTACAACACTACAACAGCCACAACGTCTATATCATGGCCGACAAGCAGAAGA  
ACGGCATCAAGGTGAACTTCAAGATCCGCCACAACATCGAGGACGGCAGCGTGCAGCTCGCCGACCACT  
ACCAGCAGAACACCCCATCGGCGACGGCCCGTGCTGCTGCCGACAACCACTACCTGAGCTACCAGT  
CCGCCCTGAGCAAAGACCCCAACGAGAAGCGCGATCACATGGTCCTGCTGGAGTTCGTGACCCGCC  
GGGATCACTCTCGGCATGGACGAGCTGTACAAGTAA

> De YFP

ATGGTATCTAAAGGGGAAGAATTATTTACTGGGGTAGTACCTATATTAGTAGAATTAGACGGGGACGTA  
AATGGGCATAAATTTTCTGTATCTGGGGAAGGGGAAGGGGACGCAACTTATGGGAAATTAACTTTAAA  
ATTTATATGTACTACTGGGAAATTACCTGTACCTTGGCCTACTTTAGTAACTACTTTTGGGTATGGGTTAC  
AATGTTTTGCAAGATATCCTGACCATATGAAACAACATGACTTTTTTAAATCTGCAATGCCTGAAGGGTA  
TGTACAAGAAAGAACTATATTTTTTAAAGACGACGGGAATTATAAACTAGAGCAGAAGTAAAATTTGA  
AGGGGACACTTTAGTAAATAGAATAGAATTAAGGGGATAGACTTTAAGAAGACGGGAATATATTAG  
GGCATAAATTAGAATATAATTATAATTCTCATAATGTATATATAATGGCAGACAAACAAAAAATGGGAT  
AAAAGTAAATTTTAAAATAAGACATAATATAGAAGACGGGTCTGTACAATTAGCAGACCATTATCAACA  
AAATACTCCTATAGGGGACGGGCCTGTATTATTACCTGACAATCATTATTTATCTTATCAATCTGCATTAT  
CTAAAGACCCTAATGAAAAAAGAGACCATATGGTATTATTAGAATTTGTAAGTGCAGCAGGGATAACTTT  
AGGGATGGACGAATTATATAAATAA

Core promoter is unlined region

> Act5C promoter

GCTAAGCGGGCTTTATAAAACGGGCTGCGGGACCAGTTTTTCATATCACTACCGTTTGAGTTCTTGTGCTG  
TGTGGATACTCCTCCGACACAAAGCCGCTCCATCAGCCAGCAGTCGTCTAATCCAGAGACACCAAACCG  
AAAGACTTAATTTATATTTATTTAATTAATTTAATAAAACACACCAAAT

> DSCP promoter



CGCCCGGGGATCGAGCGCAGCGGTATAAAAGGGCGCGGGGTGGCTGAGAGCATCAGTTGTGAATGAA  
TGTTGAGCCGAGCAGACGTGCCGCTGCCTTCGTTAATATCCTTTGAATAAGCCAACCTTTGAATCACAAG  
ACGCATACCAAACGGCATTCCGGTACTGTTGGTAAAGCCACC

> Tub promoter

TGGCCACACTGCGGCCATCGTATAAAAGCCCGCGCTCTCCAAAGCGAATGCACTAATTTTTCCAAGTGTG  
TGAAGCGGACAGTTTGTGTTGTGTTGACTGCTATAAGCGAAAGATAATTTTAAGTTAAAAGTTCAAAA  
GCCTAAAACAAATACAAAATGAGGGAAATCGTTCACATCCAAGCTGGTCAGTGCGGCAACCAAATCGGC  
GCCAAG

> Hsp70 promoter

CGCCGGAGTATAAATAGAGGCGCTTCGTCTACGGAGCGACAATTCAATTCAAACAAGCAAAGTGAACAC  
GTCGCTAAGCGAAAGCTAAGCAAATAAACAAGCGCAGCTGAACAAGCTAAACAATCTGCAGTAAAGTG  
CAAGTTAAAGTGAATCAATTAAGTAACCAGCAAC

> cMyc promoter

TACGATAGAAATTTTATTTAAGCCACAGACAACATGAAACGGGCACTATTTCTGTGGCGTCGCGTGTTC  
GTTACCCGCGGGTAATTCAGAGAATCGCTTTGTGGATTGGATTTTTGCCTGTTTTCCGCCGATACAAA  
AAAAAAAACCAAACGCTATATAAATAGTTCTGTAGTAAACCTGAAGCAACACGTTTTAAATATACAAC  
TACTACTAACAACTGTCACAGCCAAGTTACAAAAGTGCTAAATC

> Per promoter

TGCGAGTGCACGGGGCTTATACACCGGAGCTTGCGATGCGAGCACTAGTGTTGCGGAATTTAGAG  
CCAGAAGGTCGACAACGCGTTCGTCGCACAGTAGAAAGTATTGCCATATACCAAATAAATCGCAACAAC  
GACCTGTCGAATCACGCAAACAAACAGCTTCGTTTTTTTTTTTTTAATTCGACCAGAAACAAACCGTTAT  
TCTTT

**Table S1: RNA-seq samples used for the analyses in Figure 1B-D.**

|    | <b>Human</b>                      | <b>N. crassa</b>                      | <b>D. Melanogaster</b>    |
|----|-----------------------------------|---------------------------------------|---------------------------|
| 1  | Brodmann.1909.area.24             | 1 X2..sucrose                         | 1 Periphery_Wk3_ALF_ZT00  |
| 2  | Brodmann.1909.area.9              | 2 X1..miscanthus                      | 2 Periphery_Wk3_ALF_ZT06  |
| 3  | C1.segment.of.cervical.spinal.cor | 3 X1..Amylopectin                     | 3 Periphery_Wk3_ALF_ZT12  |
| 4  | EBV.transformed.lymphocyte        | 4 X1..amylose                         | 4 Periphery_Wk3_ALF_ZT18  |
| 5  | adrenal.gland                     | 5 X1..Arabinan                        | 5 Periphery_Wk3_TRF_ZT00  |
| 6  | amygdala                          | 6 X1..avicel                          | 6 Periphery_Wk3_TRF_ZT06  |
| 7  | aorta                             | 7 X1..corn.stover                     | 7 Periphery_Wk3_TRF_ZT12  |
| 8  | atrium.auricular.region           | 8 X1..eastern.cottonwood              | 8 Periphery_Wk3_TRF_ZT18  |
| 9  | blood                             | 9 X1..Energy.cane                     | 9 Periphery_Wk5_ALF_ZT00  |
| 10 | breast                            | 10 X1..galactan                       | 10 Periphery_Wk5_ALF_ZT03 |
| 11 | caudate.nucleus                   | 11 X1..Galactomannan                  | 11 Periphery_Wk5_ALF_ZT06 |
| 12 | cerebellar.hemisphere             | 12 X1..Lobloly.Pine                   | 12 Periphery_Wk5_ALF_ZT09 |
| 13 | cerebellum                        | 13 X1..MLG                            | 13 Periphery_Wk5_ALF_ZT12 |
| 14 | cerebral.cortex                   | 14 X1..Pectin.Esterified              | 14 Periphery_Wk5_ALF_ZT15 |
| 15 | coronary.artery                   | 15 X1..Pectin                         | 15 Periphery_Wk5_ALF_ZT18 |
| 16 | cortex.of.kidney                  | 16 X1..Rhamnogalacturonan             | 16 Periphery_Wk5_ALF_ZT21 |
| 17 | ectocervix                        | 17 X1..sherbourne.willow              | 17 Periphery_Wk5_TRF_ZT00 |
| 18 | endocervix                        | 18 X1..Switchgrass                    | 18 Periphery_Wk5_TRF_ZT03 |
| 19 | esophagogastric.junction          | 19 X1..Wing.nut                       | 19 Periphery_Wk5_TRF_ZT06 |
| 20 | esophagus.mucosa                  | 20 X1..Xylan                          | 20 Periphery_Wk5_TRF_ZT09 |
| 21 | esophagus.muscularis.mucosa       | 21 X1..Xyloglucan                     | 21 Periphery_Wk5_TRF_ZT12 |
| 22 | fallopian.tube                    | 22 X2mM.arabinose                     | 22 Periphery_Wk5_TRF_ZT15 |
| 23 | greater.omentum                   | 23 X2mM.cellobiose                    | 23 Periphery_Wk5_TRF_ZT18 |
| 24 | heart.left.ventricle              | 24 X2mM.fructose                      | 24 Periphery_Wk5_TRF_ZT21 |
| 25 | hippocampus.proper                | 25 X2mM.fucose                        | 25 Periphery_Wk7_ALF_ZT00 |
| 26 | hypothalamus                      | 26 X2mM.galactose                     | 26 Periphery_Wk7_ALF_ZT06 |
| 27 | liver                             | 27 X2mM.galacturonic.acid             | 27 Periphery_Wk7_ALF_ZT12 |
| 28 | lower.leg.skin                    | 28 X2mM.glucuronic.acid               | 28 Periphery_Wk7_ALF_ZT18 |
| 29 | lung                              | 29 X2mM.glycerol                      | 29 Periphery_Wk7_TRF_ZT00 |
| 30 | minor.salivary.gland              | 30 X2mM.maltose                       | 30 Periphery_Wk7_TRF_ZT06 |
| 31 | nucleus.accumbens                 | 31 X2mM.mannitol                      | 31 Periphery_Wk7_TRF_ZT12 |
| 32 | ovary                             | 32 X2mM.mannose                       | 32 Periphery_Wk7_TRF_ZT18 |
| 33 | pancreas                          | 33 X2mM.rhamnose                      | 33 Head_Wk3_ALF_ZT00      |
| 34 | pituitary.gland                   | 34 X2mM.ribose                        | 34 Head_Wk3_ALF_ZT06      |
| 35 | prostate.gland                    | 35 X2mM.sorbose                       | 35 Head_Wk3_ALF_ZT12      |
| 36 | putamen                           | 36 X2mM.trehalose                     | 36 Head_Wk3_ALF_ZT18      |
| 37 | sigmoid.colon                     | 37 X2mM.xylose                        | 37 Head_Wk3_TRF_ZT00      |
| 38 | skeletal.muscle.tissue            | 38 citrus.peel                        | 38 Head_Wk3_TRF_ZT06      |
| 39 | small.intestine.Peyer.s.patch     | 39 Starvation                         | 39 Head_Wk3_TRF_ZT12      |
| 40 | spleen                            | 40 X0.4..NaNO3                        | 40 Head_Wk3_TRF_ZT18      |
| 41 | stomach                           | 41 X0.25mM.Methionine..low.sulfur.    | 41 Head_Wk5_ALF_ZT00      |
| 42 | subcutaneous.adipose.tissue       | 42 X1..Abies.alba.sapwood             | 42 Head_Wk5_ALF_ZT03      |
| 43 | substantia.nigra                  | 43 X1..BSA                            | 43 Head_Wk5_ALF_ZT06      |
| 44 | suprapubic.skin                   | 44 X1..cedrus.libani.kearn.or.heartwo | 44 Head_Wk5_ALF_ZT09      |
| 45 | testis                            | 45 X1..Cedrus.libani.splint.wood      | 45 Head_Wk5_ALF_ZT12      |
| 46 | thyroid.gland                     | 46 X1..Glucomannan                    | 46 Head_Wk5_ALF_ZT15      |
| 47 | tibial.artery                     | 47 X1..inulin                         | 47 Head_Wk5_ALF_ZT18      |
| 48 | tibial.nerve                      | 48 X1..lignin                         | 48 Head_Wk5_ALF_ZT21      |
| 49 | transformed.skin.fibroblast       | 49 X1..picea.abies.heartwood          | 49 Head_Wk5_TRF_ZT00      |
| 50 | transverse.colon                  | 50 X1..Picea.abies.sapwood            | 50 Head_Wk5_TRF_ZT03      |
| 51 | urinary.bladder                   | 51 X1..Polygalacturonic.acid          | 51 Head_Wk5_TRF_ZT06      |
| 52 | uterus                            | 52 X1..Quercas.robur.sapwood          | 52 Head_Wk5_TRF_ZT09      |
| 53 | vagina                            | 53 X1..robina.pseudoararia.heartwoor  | 53 Head_Wk5_TRF_ZT12      |
|    |                                   | 54 X1..robina.pseudoararia.sapwood    | 54 Head_Wk5_TRF_ZT15      |
|    |                                   | 55 X2mM.mannobiose                    | 55 Head_Wk5_TRF_ZT18      |
|    |                                   | 56 X3.4mM.arginine                    | 56 Head_Wk5_TRF_ZT21      |
|    |                                   | 57 X4.3mM.proline                     | 57 Head_Wk7_ALF_ZT00      |
|    |                                   | 58 X5mM.glutamate                     | 58 Head_Wk7_ALF_ZT06      |
|    |                                   | 59 X5mM.glutamine                     | 59 Head_Wk7_ALF_ZT12      |
|    |                                   | 60 X5mM.Methionine..high.sulfur.      | 60 Head_Wk7_ALF_ZT18      |
|    |                                   | 61 X10.1mM.alanine                    | 61 Head_Wk7_TRF_ZT00      |
|    |                                   | 62 X20mM.glycine                      | 62 Head_Wk7_TRF_ZT06      |

|                                      |                       |
|--------------------------------------|-----------------------|
| 63 Bird.s.medium..NH4.only.          | 63 Head_Wk7_TRF_ZT12  |
| 64 Fries.medium..low.phosphate..0.0! | 64 Head_Wk7_TRF_ZT18  |
| 65 Fries.medium                      | 65 Heart_Wk5_ALF_ZT00 |
| 66 no.nitrogen                       | 66 Heart_Wk5_ALF_ZT06 |
| 67 no.phosphate                      | 67 Heart_Wk5_ALF_ZT12 |
| 68 no.sulfur                         | 68 Heart_Wk5_ALF_ZT18 |
| 69 X2mM.sodium.acetate               | 69 Heart_Wk5_TRF_ZT00 |
| 70 X2mM.lactose                      | 70 Heart_Wk5_TRF_ZT06 |
| 71 X2mM.sorbitol                     | 71 Heart_Wk5_TRF_ZT12 |
|                                      | 72 Heart_Wk5_TRF_ZT18 |

**Table S3: The primer sequences used for the template amplification used for making probes for Northern blot analysis.**

5xMyc-luciferase 5' end (5'- TGATATCATCGATTTAAAGCA -3', 5'-  
TGCTAATACGACTCACTATAGGGAGCATGTCGCCAAGCTCTCCAT -3')

eYFP 5' end (5'- ATGGTGAGCAAGGGCGAGGAGCTG -3', 5'-  
TGCTAATACGACTCACTATAGGGAGCCTCGCCGGACACGCTGAAC -3')

YFP 3'UTR (5'- TCTTTGTGAAGGAACCTTAC -3', 5'-  
TGCTAATACGACTCACTATAGGGAGTTCATCAGTTCATAGGTTG -3')

Ars2 3'UTR (5'- TATCGGTTACCATGATTTGG -3', 5'-  
TGCTAATACGACTCACTATAGGGAGTCGCACTTTATTCCTTGTG -3')

Mtr4 3'UTR (5'- CGACTGGAGGAGCTTCTGCG -3', 5'-  
TGCTAATACGACTCACTATAGGGAGATTTACAAAGGTTGTTAGGG -3')

ZCCHC8 3'UTR (5'- GCTCGTCGCCTTGGAAGGCG -3', 5'-  
TGCTAATACGACTCACTATAGGGAGTCCAGCCAAGCAGGCGGATA -3')

Rrp40 3'UTR (5'- GAGCTGGTCTGCGTCAACTC -3', 5'-  
TGCTAATACGACTCACTATAGGGAGTAAGGGTAGTACTATCTTTC -3')

Hsp70 5'end (5'- ATGCCTGCTATTGGAATCGATCTG -3', 5'-  
TGCTAATACGACTCACTATAGGGAGCCGATCAGTCGCTTGGCGTCAAAC -3')

U6 (5'- CGGCAGAACATATACTAAAATTGG -3', 5'-  
TAATACGACTCACTATAGGGAGTGTGGAACGCTTCACGATTTTGCG -3')

gapdh (5'- AGTCCACCGGAGTGTTACC -3', 5'-  
TGCTAATACGACTCACTATAGGGAGAGAAGTCGGTGGAGACCACC -3')

Gal4 (5'- ATGAAGCTACTGTCTTCTATCG -3', 5'-  
TGCTAATACGACTCACTATAGGGAGTGTGCCCTAGTCAGCGGAGACC -3')

hph (5'- ATGAAAAAGCCTGAACTACCG -3', 5'-  
TGCTAATACGACTCACTATAGGGAGTTGTAGAAACCATCGGCGCAGC -3').
